# Supplementary material for: Anti-SARS-CoV-2 Spike Antibody Titers and Neutralizing Antibodies in Vaccinated Rheumatoid Arthritis Patients
Source: MDPI journal article supplement (doi:10.3390/vaccines10081365), 2022-08-21
Supplement: s1 [file s1]

Supplementary Table S1. Correlations of clinical manifestations and anti-SARS-CoV-2 Abs in controls.

| clinical manifestations                                      | Controls (early collection) |                  |          |                                  |              |          | Controls (late collection) |                 |          |                                  |               |          |
|--------------------------------------------------------------|-----------------------------|------------------|----------|----------------------------------|--------------|----------|----------------------------|-----------------|----------|----------------------------------|---------------|----------|
|                                                              | anti-SARS-CoV-2 S Abs       |                  |          | anti-SARS-CoV-2 neutralizing Abs |              |          | anti-SARS-CoV-2 S Abs      |                 |          | anti-SARS-CoV-2 neutralizing Abs |               |          |
|                                                              | PRC                         | 95%CI            | <i>P</i> | PRC                              | 95%CI        | <i>P</i> | PRC                        | 95%CI           | <i>P</i> | PRC                              | 95%CI         | <i>P</i> |
| Age, years                                                   | -28.39                      | (-39.84~-16.94)  | <0.0001  | -0.09                            | (-0.18~0.01) | 0.0710   | -12.35                     | (-18.04~-6.67)  | <0.0001  | 0.22                             | (-0.41~0.84)  | 0.4935   |
| Male                                                         | -420.38                     | (-745.24~-95.52) | 0.0117   | -1.60                            | (-4.15~0.94) | 0.2145   | -167.12                    | (-326.64~-7.60) | 0.0402   | 1.16                             | (-0.29~2.60)  | 0.1161   |
| Interval between last vaccination and blood collection, days | -14.11                      | (-28.01~-0.21)   | 0.0467   | -0.07                            | (-0.18~0.04) | 0.1991   | -2.96                      | (-9.82~3.90)    | 0.3941   | -0.07                            | (-0.13~-0.01) | 0.0318   |

Association for anti-SARS-CoV-2 S Abs was tested by linear regression analysis. PRC: partial regression coefficient, CI: confidence interval.

Supplementary Table S2. Multiple linear regression analysis of clinical manifestations for anti-SARS-CoV-2 Abs.

| anti-SARS-CoV-2 S Abs<br>clinical manifestations                | Unconditioned |                     |          | Conditioned on the other clinical manifestations |                 |                              |
|-----------------------------------------------------------------|---------------|---------------------|----------|--------------------------------------------------|-----------------|------------------------------|
|                                                                 | PRC           | 95%CI               | <i>P</i> | PRC <sub>adjusted</sub>                          | 95%CI           | <i>P</i> <sub>adjusted</sub> |
| Age, years                                                      | -26.97        | (-31.62~-22.33)     | <0.0001  | -22.86                                           | (-31.02~-14.71) | <0.0001                      |
| Male                                                            | -206.75       | (-462.47~48.98)     | 0.1125   | -163.02                                          | (-375.53~49.50) | 0.1320                       |
| Interval between last vaccination<br>and blood collection, days | -8.78         | (-12.25~-5.31)      | <0.0001  | 2.46                                             | (-1.51~6.44)    | 0.2234                       |
| RA                                                              | -902.16       | (-1,101.08~-703.25) | <0.0001  | -300.15                                          | (-663.28~62.98) | 0.1047                       |
| anti-SARS-CoV-2 neutralizing Abs<br>clinical manifestations     | Unconditioned |                     |          | Conditioned on the other clinical manifestations |                 |                              |
|                                                                 | PRC           | 95%CI               | <i>P</i> | PRC <sub>adjusted</sub>                          | 95%CI           | <i>P</i> <sub>adjusted</sub> |
| Age, years                                                      | 0.03          | (-0.01~0.07)        | 0.1715   | -0.03                                            | (-0.10~0.03)    | 0.3213                       |
| Male                                                            | -1.18         | (-2.93~0.57)        | 0.1856   | -0.59                                            | (-2.37~1.19)    | 0.5124                       |
| Interval between last vaccination<br>and blood collection, days | -0.005        | (-0.03~0.02)        | 0.7103   | -0.05                                            | (-0.09~-0.02)   | 0.0022                       |
| RA                                                              | 2.15          | (0.59~3.71)         | 0.0072   | 5.48                                             | (2.44~8.52)     | 0.0005                       |

RA: rheumatoid arthritis, PRC: partial regression coefficient, CI: confidence interval. *P*, PRC, 95%CI, *P*<sub>adjusted</sub>, PRC<sub>adjusted</sub> were calculated by linear regression analysis on RA patients and controls (early collection).
